# Supplementary material for: Synthesis and characterization of chromium complexes 2-Me4CpC6H4CH2(R)NHCrCl2 and their catalytic properties in ethylene homo- and co-polymerization
Source: Royal Society of Chemistry journal article supplement (doi:10.1039/c9dt00448c), 2019-01-01
Supplement: c9dt00448c1.pdf [file c9dt00448c1.pdf]

## Electronic Supplementary Information

### Synthesis and Characterization of Chromium Complexes 2- $\text{Me}_4\text{CpC}_6\text{H}_4\text{CH}_2(\text{R})\text{NHCrCl}_2$ and Their Catalytic Properties in Ethylene Homo- and Co-polymerization

Tingting Song, Xin Tao, Xiaobo Tong, Ning Liu, Wei Gao, Xiaoyue Mu\*, Ying Mu\*

*The State Key Laboratory for Supramolecular Structure and Materials, School of Chemistry, Jilin University, 2699 Qianjin Street, Changchun 130012, People's Republic of China*

#### Table of Contents

|                                                                                                                                |     |
|--------------------------------------------------------------------------------------------------------------------------------|-----|
| 1. Crystal Data and Structure Refinements of Complexes <b>1</b> , <b>5</b> and <b>6</b>                                        | S2  |
| 2. GPC traces for typical poly(ethylene-co-1-hexene) samples                                                                   | S3  |
| 3. $^{13}\text{C}$ NMR spectra for typical poly(ethylene-co-1-hexene) samples                                                  | S6  |
| 4. UV/Vis spectra of complexes <b>1–6</b>                                                                                      | S9  |
| 5. NMR spectra of the ligands $\text{H}_2\text{L3}$ , $\text{H}_2\text{L5}$ , $\text{H}_2\text{L6}$ , and complexes <b>1–6</b> | S12 |

**Table S1** Crystal Data and Structure Refinements of Complexes **1**, **5** and **6**

|                                                                                                                       | <b>1</b>                                            | <b>5</b>                                            | <b>6</b>                                            |
|-----------------------------------------------------------------------------------------------------------------------|-----------------------------------------------------|-----------------------------------------------------|-----------------------------------------------------|
| empirical formula                                                                                                     | C <sub>19</sub> H <sub>25</sub> Cl <sub>2</sub> CrN | C <sub>24</sub> H <sub>27</sub> Cl <sub>2</sub> CrN | C <sub>26</sub> H <sub>31</sub> Cl <sub>2</sub> CrN |
| <i>M<sub>w</sub></i>                                                                                                  | 390.30                                              | 452.37                                              | 480.42                                              |
| crystal system                                                                                                        | Monoclinic                                          | Monoclinic                                          | Orthorhombic                                        |
| space group                                                                                                           | C2/c                                                | P2(1)/c                                             | Pna2(1)                                             |
| <i>a</i> (Å)                                                                                                          | 25.969(2)                                           | 10.4590(8)                                          | 15.3969(7)                                          |
| <i>b</i> (Å)                                                                                                          | 9.2271(8)                                           | 26.893(2)                                           | 18.3161(9)                                          |
| <i>c</i> (Å)                                                                                                          | 16.7645(14)                                         | 8.5983(6)                                           | 8.5618(4)                                           |
| <i>α</i> (deg)                                                                                                        | 90                                                  | 90                                                  | 90                                                  |
| <i>β</i> (deg)                                                                                                        | 110.1890(10)                                        | 113.7230(10)                                        | 90                                                  |
| <i>γ</i> (deg)                                                                                                        | 90                                                  | 90                                                  | 90                                                  |
| <i>V</i> (Å <sup>3</sup> )                                                                                            | 3770.3(6)                                           | 2214.1(3)                                           | 2414.5(2)                                           |
| <i>Z</i>                                                                                                              | 8                                                   | 4                                                   | 4                                                   |
| <i>D</i> <sub>calcd</sub> (mg m <sup>-3</sup> )                                                                       | 1.375                                               | 1.357                                               | 1.322                                               |
| abs. coeff. (mm <sup>-1</sup> )                                                                                       | 0.889                                               | 0.768                                               | 0.708                                               |
| 2θ mas (deg)                                                                                                          | 1.67-26.39                                          | 2.13-26.39                                          | 1.73-26.39                                          |
| transmission range                                                                                                    | 0.8782-0.8493                                       | 0.8936-0.8679                                       | 0.9012-0.8772                                       |
| reflections collected                                                                                                 | 10485                                               | 12593                                               | 12947                                               |
| independent reflections                                                                                               | 3838 [ <i>R</i> (int) =<br>0.0386]                  | 4521 [ <i>R</i> (int) =<br>0.0367]                  | 4864 [ <i>R</i> (int) =<br>0.0353]                  |
| <i>R</i> <sub>1</sub> <sup><i>a</i></sup> ( <i>wR</i> <sub>2</sub> ) <sup><i>b</i></sup> [ <i>I</i> > 2σ( <i>I</i> )] | 0.0452<br>0.1077                                    | 0.0457<br>0.1043                                    | 0.0455<br>0.1128                                    |
| GOF ( <i>F</i> <sup>2</sup> )                                                                                         | 1.054                                               | 1.049                                               | 0.999                                               |
| largest diff. peak<br>and hole/e Å <sup>-3</sup>                                                                      | 0.693<br>-0.273                                     | 0.709<br>-0.265                                     | 0.407<br>-0.296                                     |

<sup>*a*</sup>  $R_1 = \sum ||F_o| - |F_c|| / \sum |F_o|$ .    <sup>*b*</sup>  $wR_2 = [\sum [w (F_o^2 - F_c^2)^2] / \sum [w (F_o^2)^2]]^{1/2}$

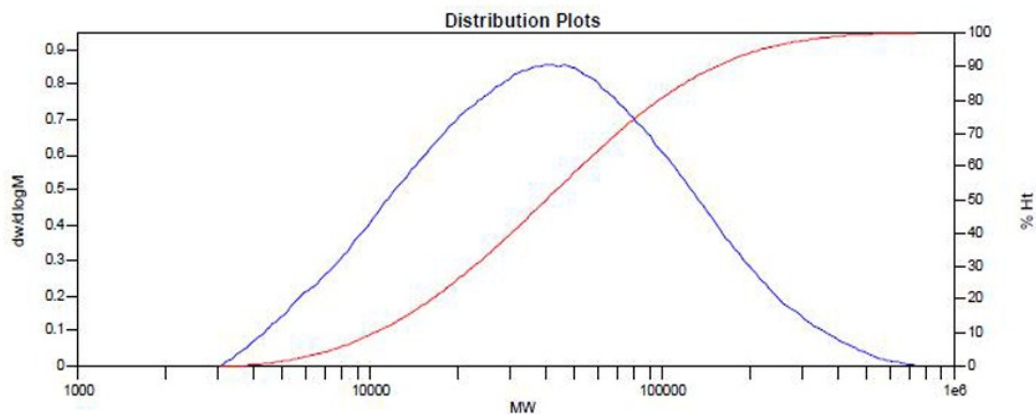

**Figure S1** GPC trace for poly(ethylene-co-1-hexene) sample (entry 18, Table 3,  $M_w = 6.48 \times 10^4$  g/mol,  $M_w/M_n = 2.68$ ).

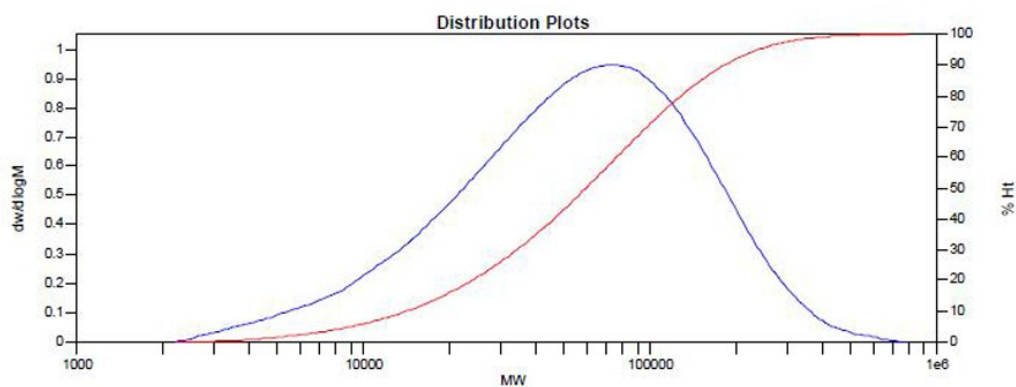

**Figure S2** GPC trace for poly(ethylene-co-1-hexene) sample (entry 21, Table 3,  $M_w = 8.20 \times 10^4$  g/mol,  $M_w/M_n = 2.62$ ).

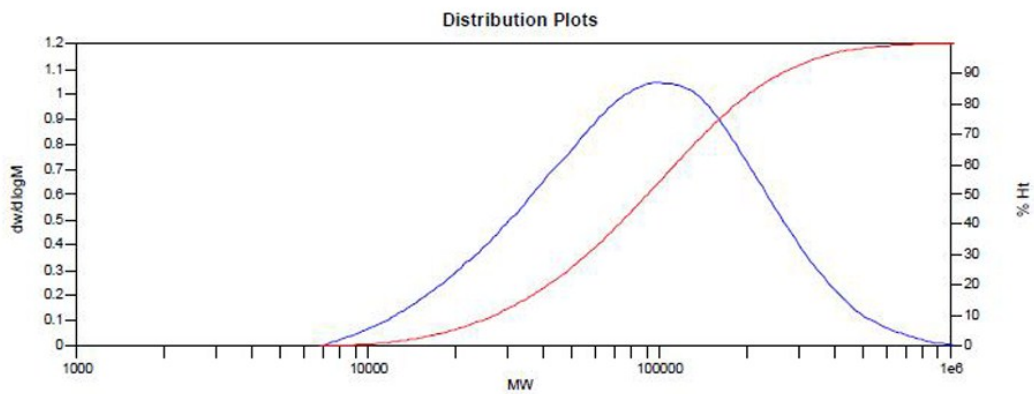

**Figure S3** GPC trace for poly(ethylene-co-1-hexene) sample (entry 24, Table 3,  $M_w = 12.22 \times 10^4$  g/mol,  $M_w/M_n = 2.08$ ).

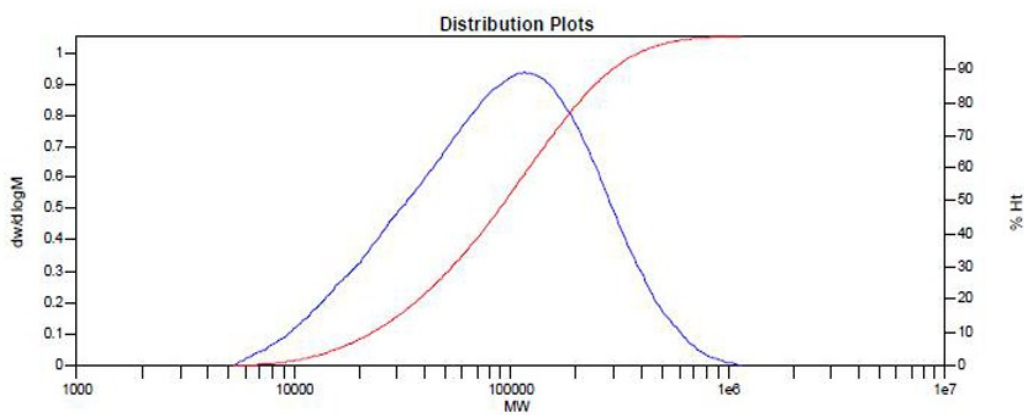

**Figure S4** GPC trace for poly(ethylene-co-1-hexene) sample (entry 27, Table 3,  $M_w = 13.18 \times 10^4$  g/mol,  $M_w/M_n = 2.47$ ).

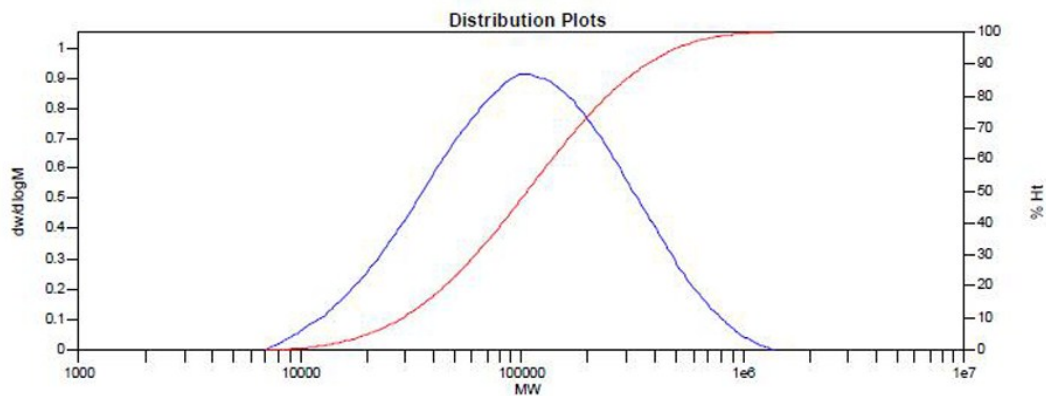

**Figure S5** GPC trace for poly(ethylene-co-1-hexene) sample (entry 30, Table 3,  $M_w = 16.02 \times 10^4$  g/mol,  $M_w/M_n = 2.45$ ).

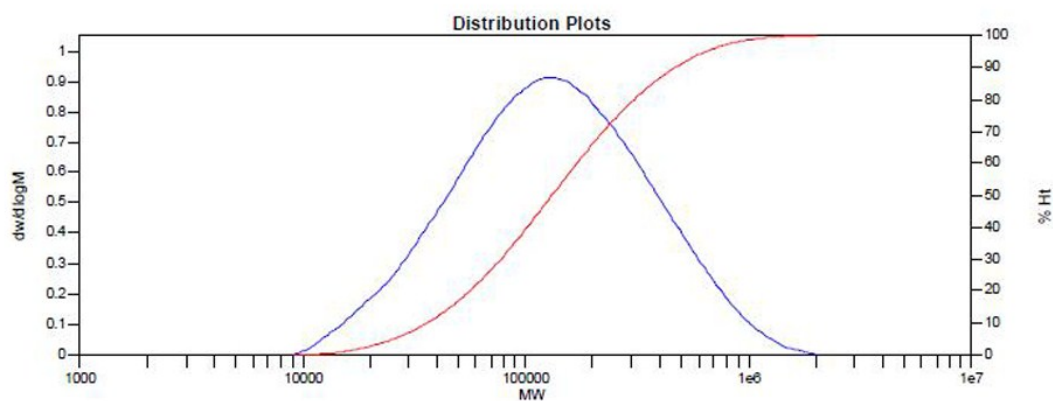

**Figure S6** GPC trace for poly(ethylene-co-1-hexene) sample (entry 33, Table 3,  $M_w = 20.31 \times 10^4$  g/mol,  $M_w/M_n = 2.48$ ).

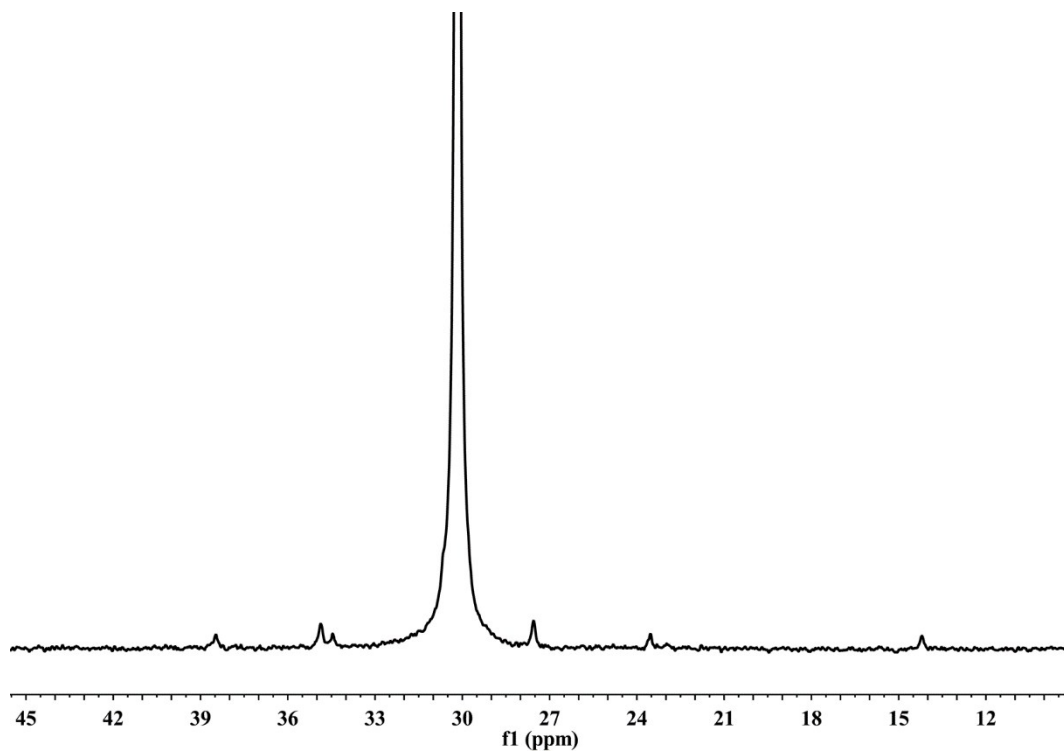

**Figure S7**  $^{13}\text{C}$  NMR spectra for poly(ethylene-co-1-hexene) sample (entry 21, Table 3).

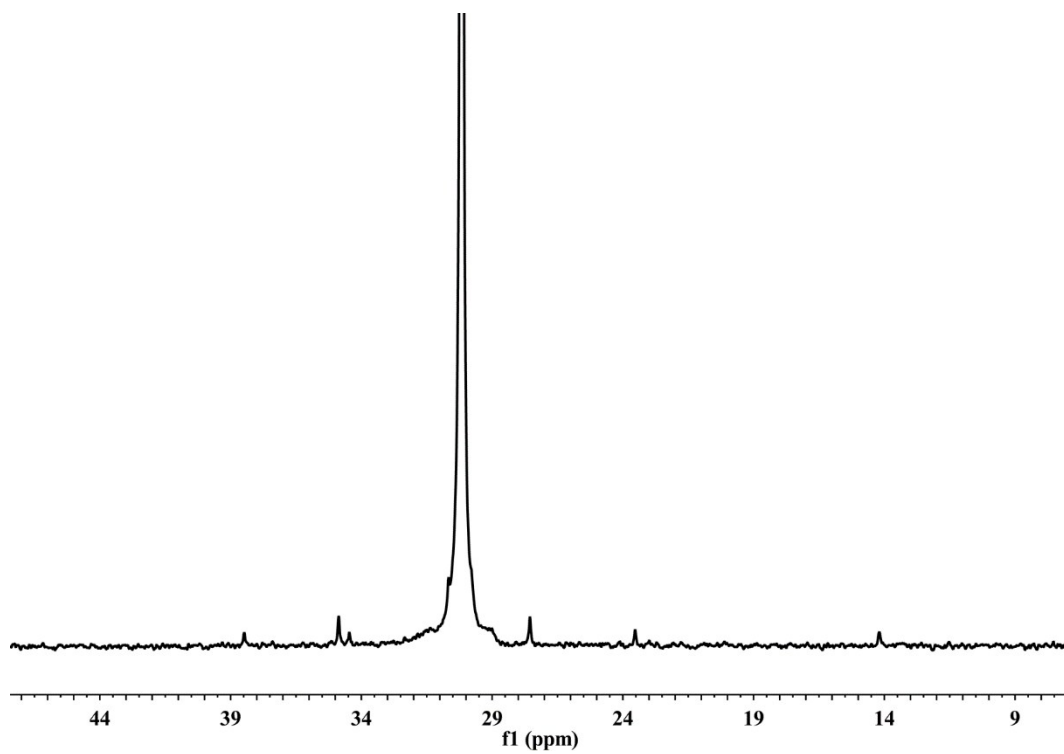

**Figure S8**  $^{13}\text{C}$  NMR spectra for poly(ethylene-co-1-hexene) sample (entry 24, Table 3).

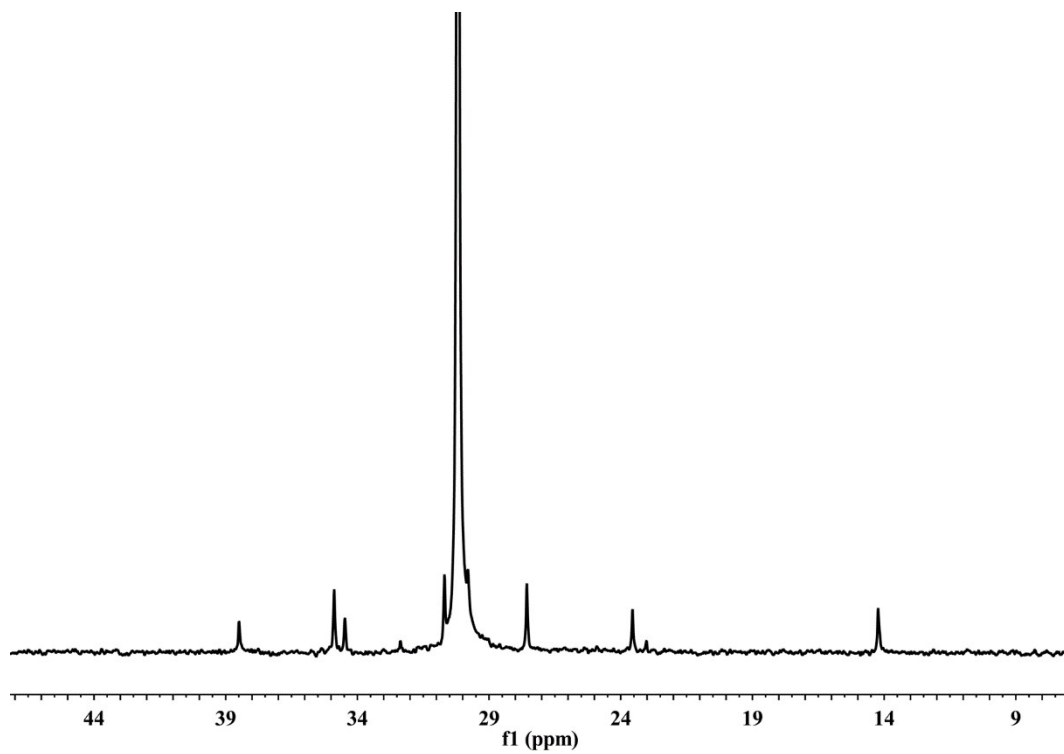

**Figure S9**  $^{13}\text{C}$  NMR spectra for poly(ethylene-co-1-hexene) sample (entry 27, Table 3).

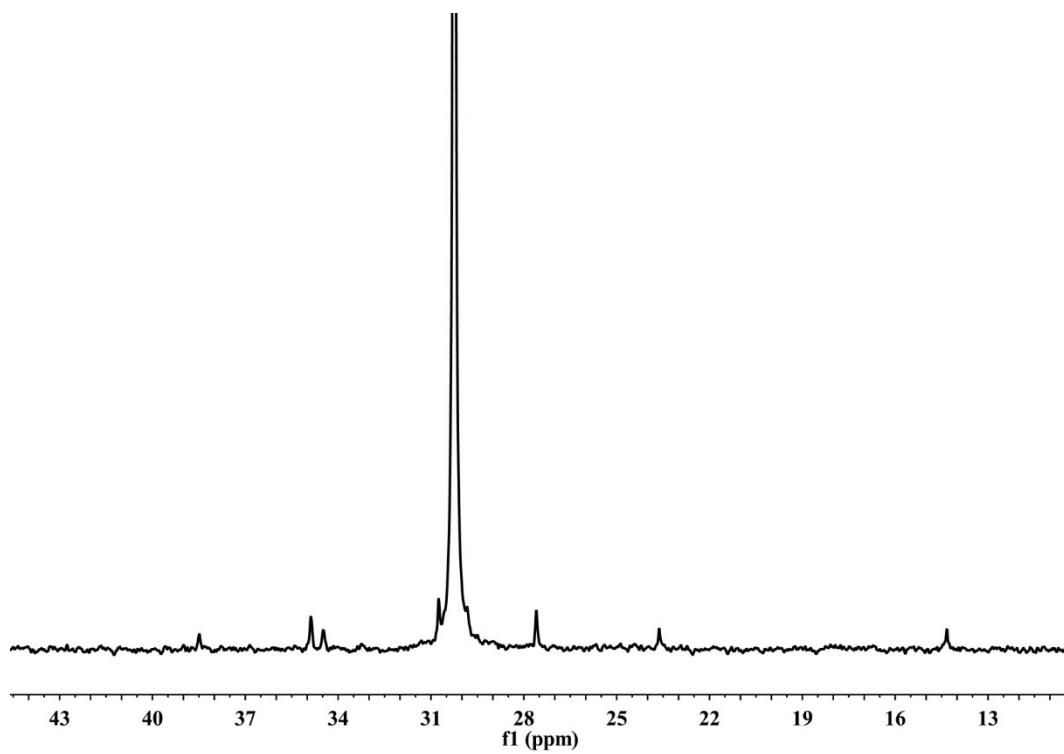

**Figure S10**  $^{13}\text{C}$  NMR spectra for poly(ethylene-co-1-hexene) sample (entry 30, Table 3).

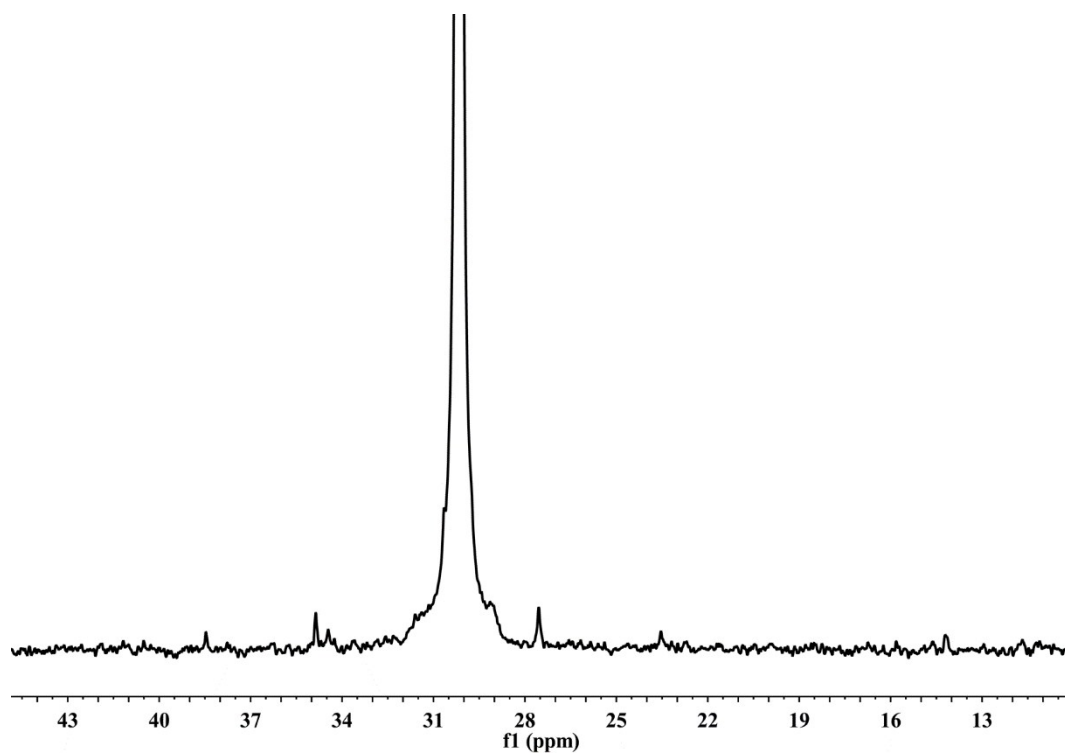

**Figure S11**  $^{13}\text{C}$  NMR spectra for poly(ethylene-co-1-hexene) sample (entry 33, Table 3).

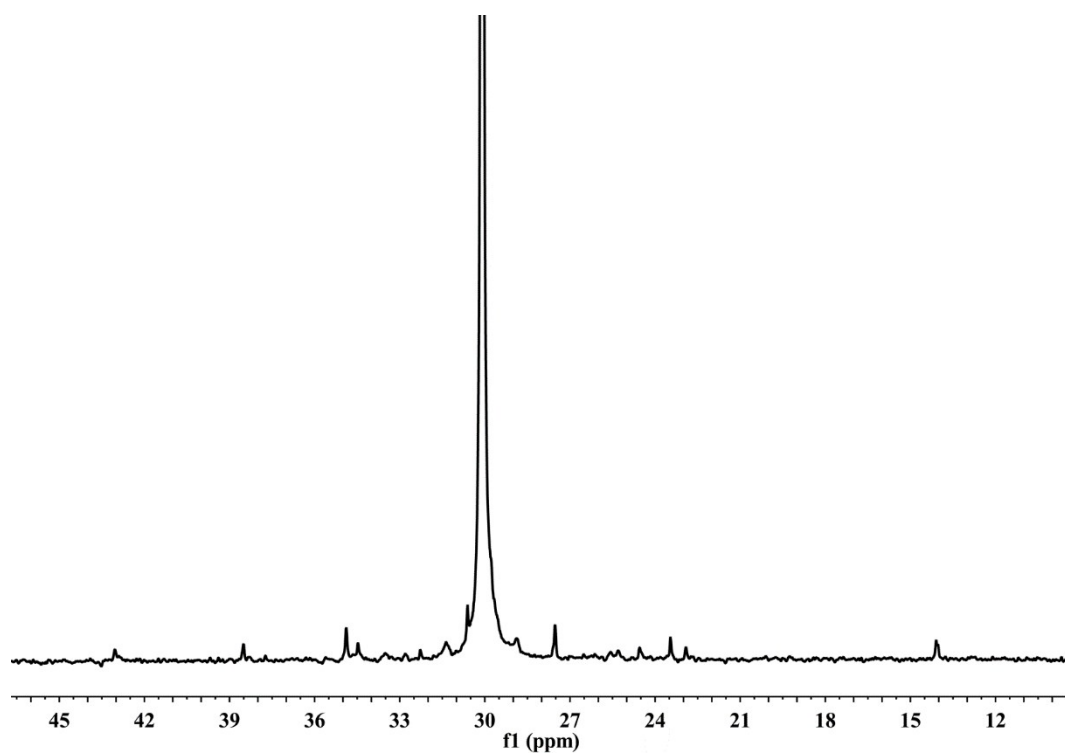

**Figure S12**  $^{13}\text{C}$  NMR spectra for poly(ethylene-co-1-hexene) sample (entry 36, Table 3).



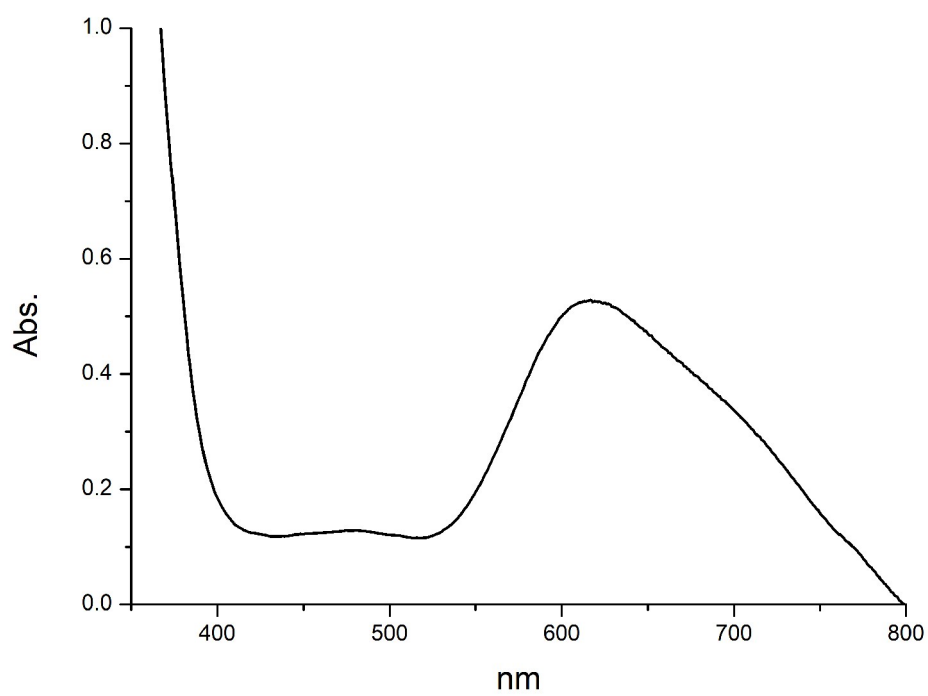

**Figure S13** UV/Vis spectra of complex 1.

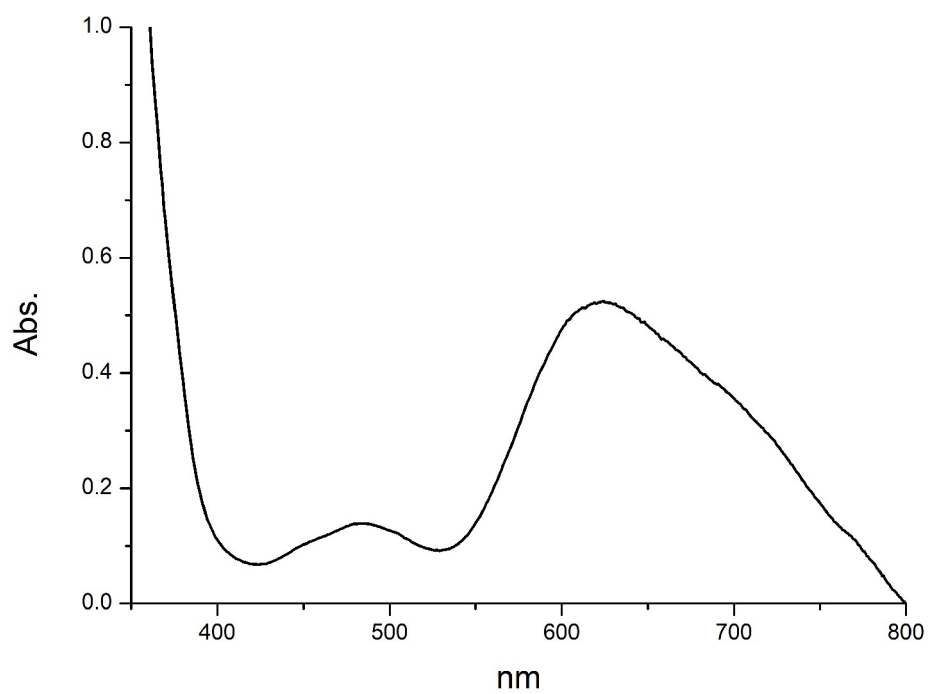

**Figure S14** UV/Vis spectra of complex 2.

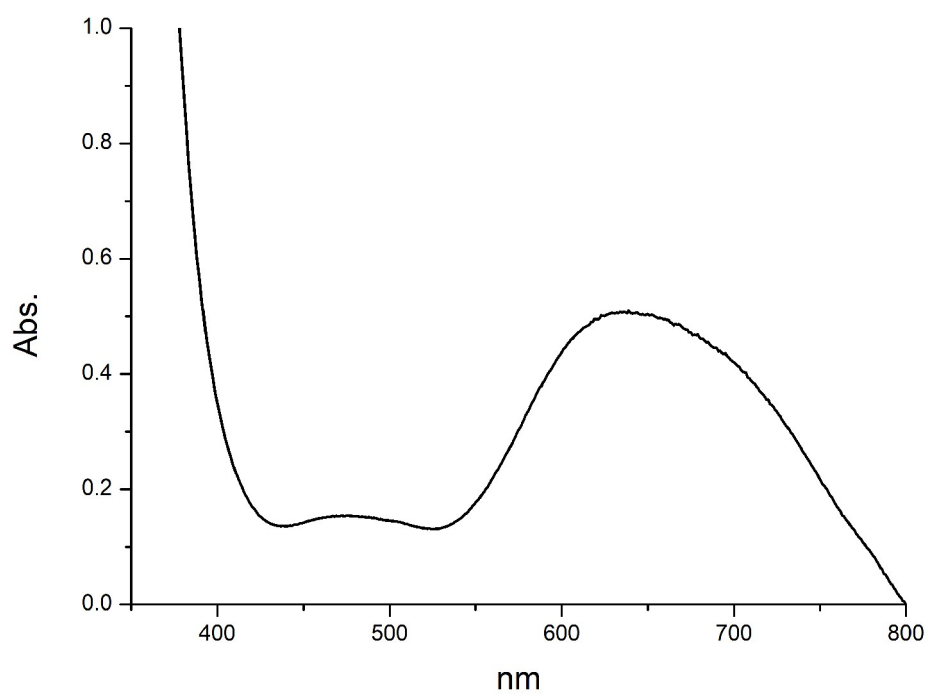

**Figure S15** UV/Vis spectra of complex **3**.

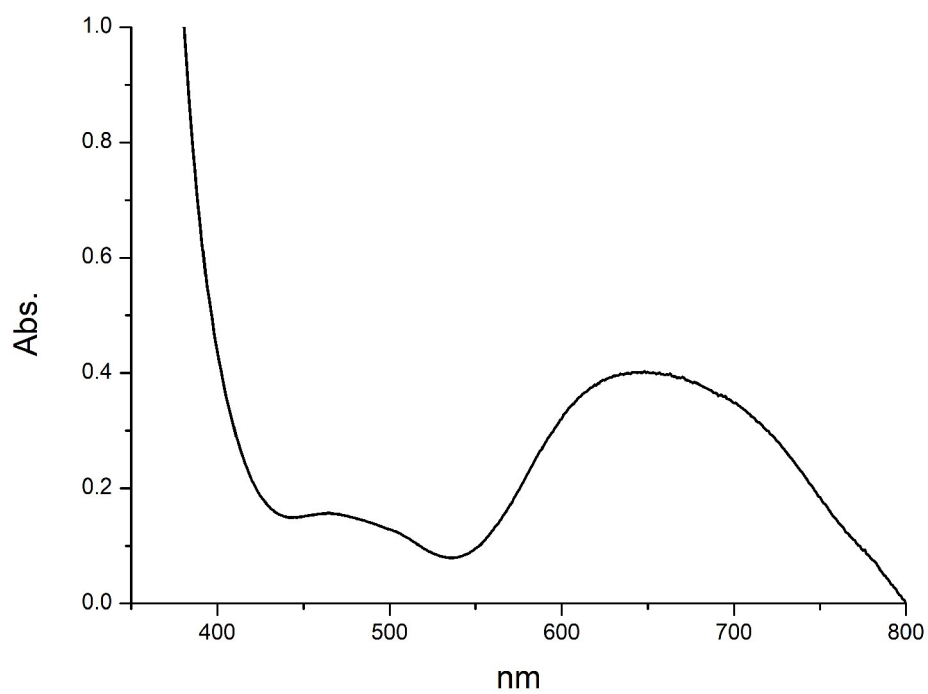

**Figure S16** UV/Vis spectra of complex **4**.

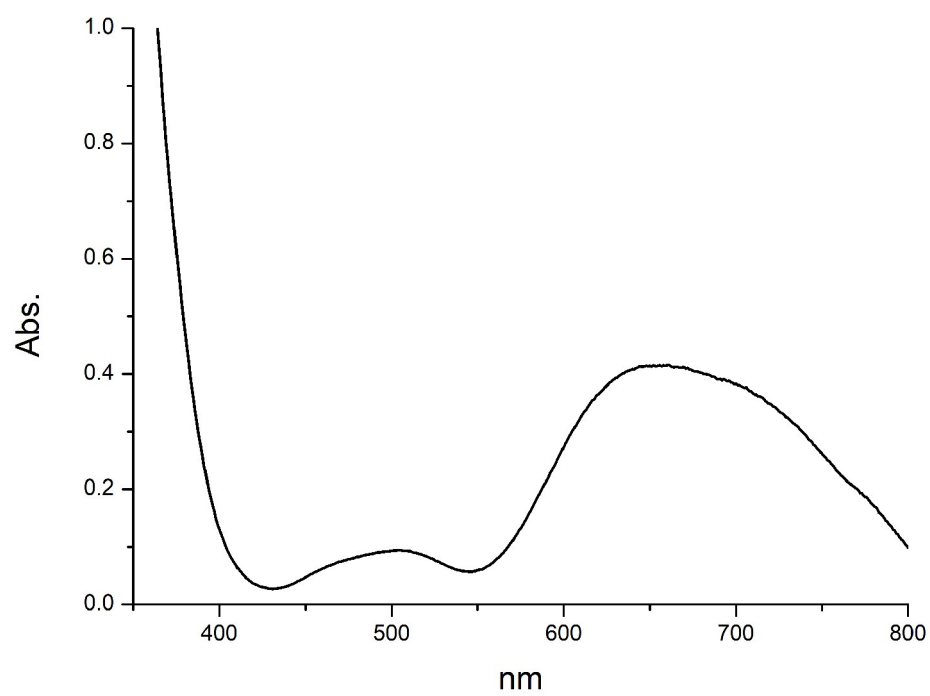

**Figure S17** UV/Vis spectra of complex 5.

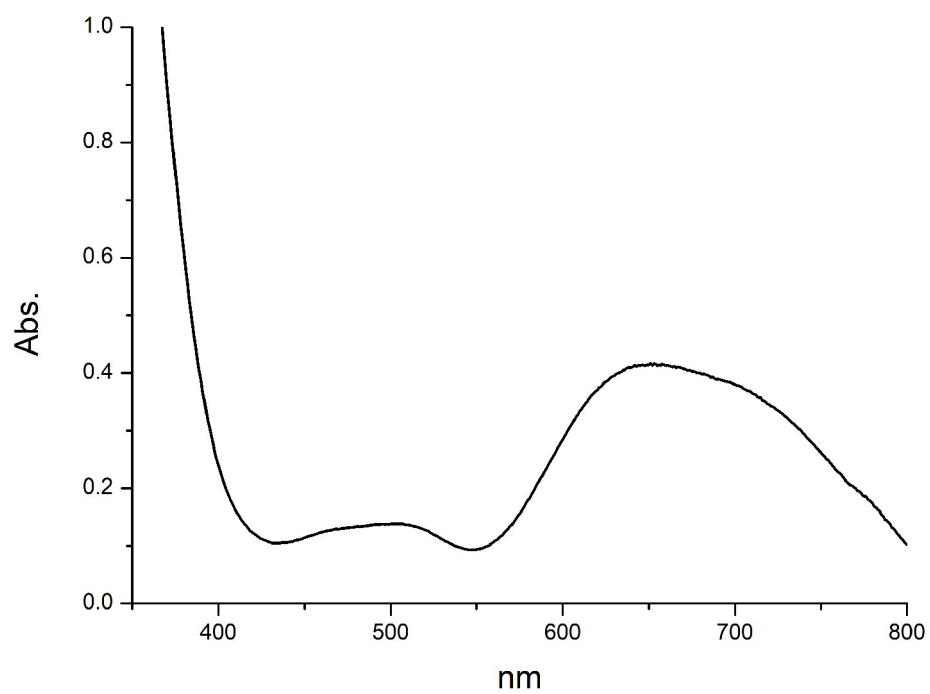

**Figure S18** UV/Vis spectra of complex 6.

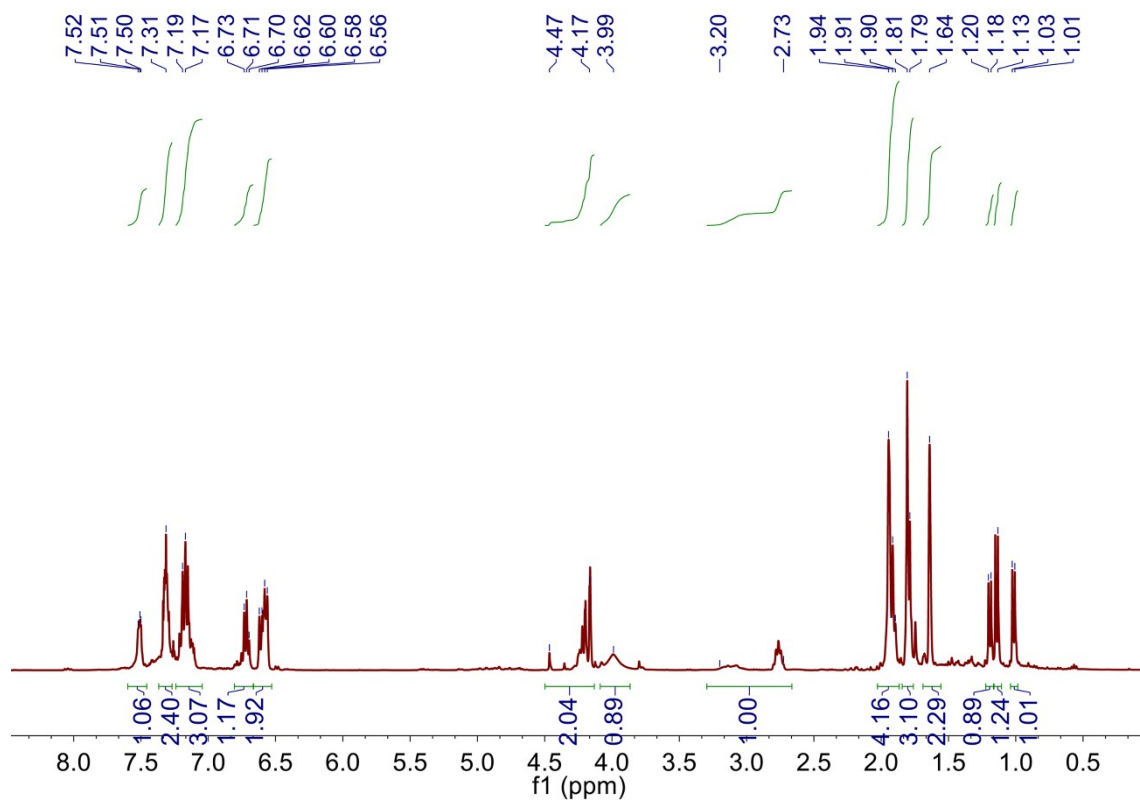

**Figure S19**  $^1\text{H}$  NMR spectrum of  $\text{H}_2\text{L3}$  (400 MHz,  $\text{CDCl}_3$ , 25 °C).

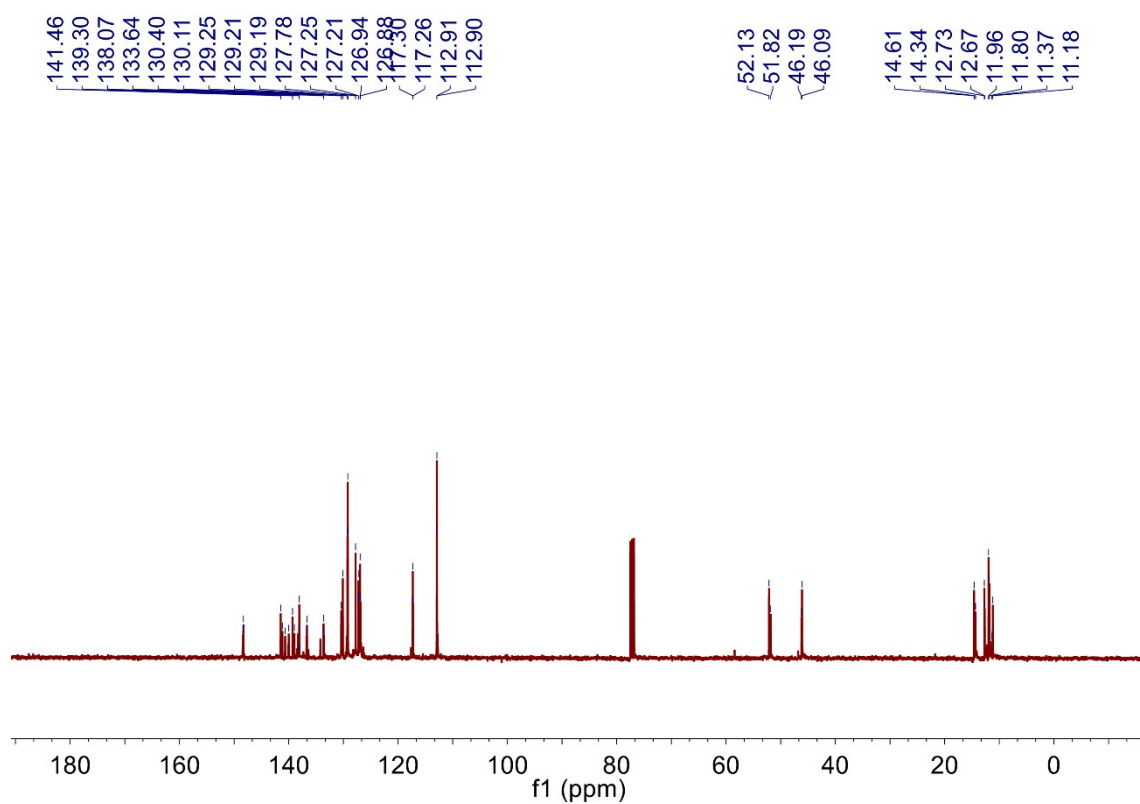

**Figure S20**  $^{13}\text{C}$   $\{^1\text{H}\}$  NMR spectrum of  $\text{H}_2\text{L3}$  (100 MHz,  $\text{CDCl}_3$ , 25 °C).

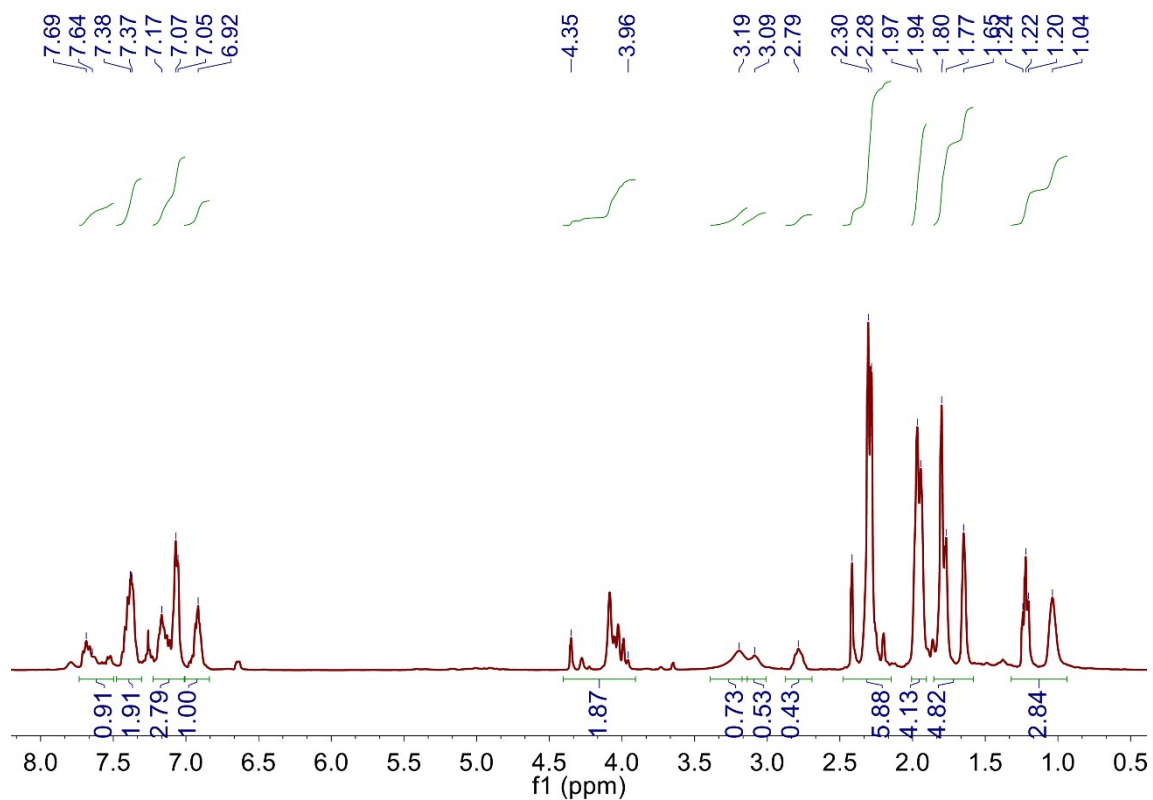

Figure S21  $^1\text{H}$  NMR spectrum of  $\text{H}_2\text{L5}$  (400 MHz,  $\text{CDCl}_3$ , 25  $^\circ\text{C}$ ).

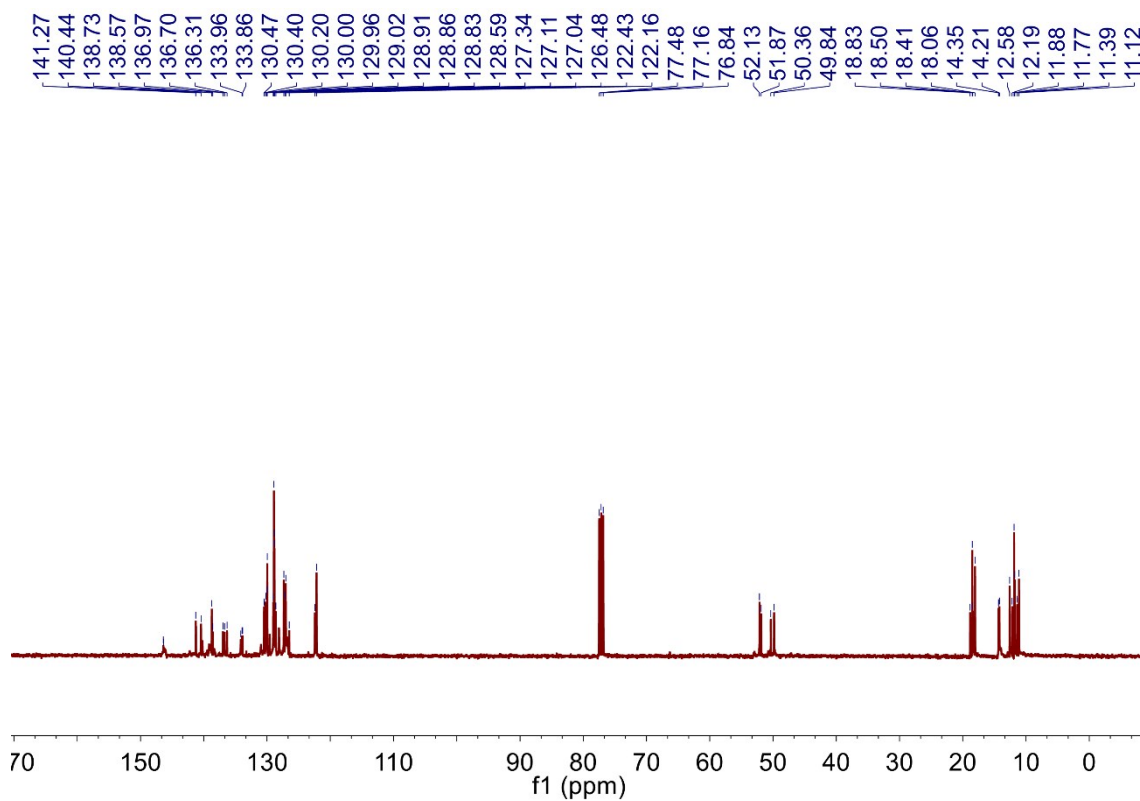

Figure S22  $^{13}\text{C}$   $\{^1\text{H}\}$  NMR spectrum of  $\text{H}_2\text{L5}$  (100 MHz,  $\text{CDCl}_3$ , 25  $^\circ\text{C}$ ).

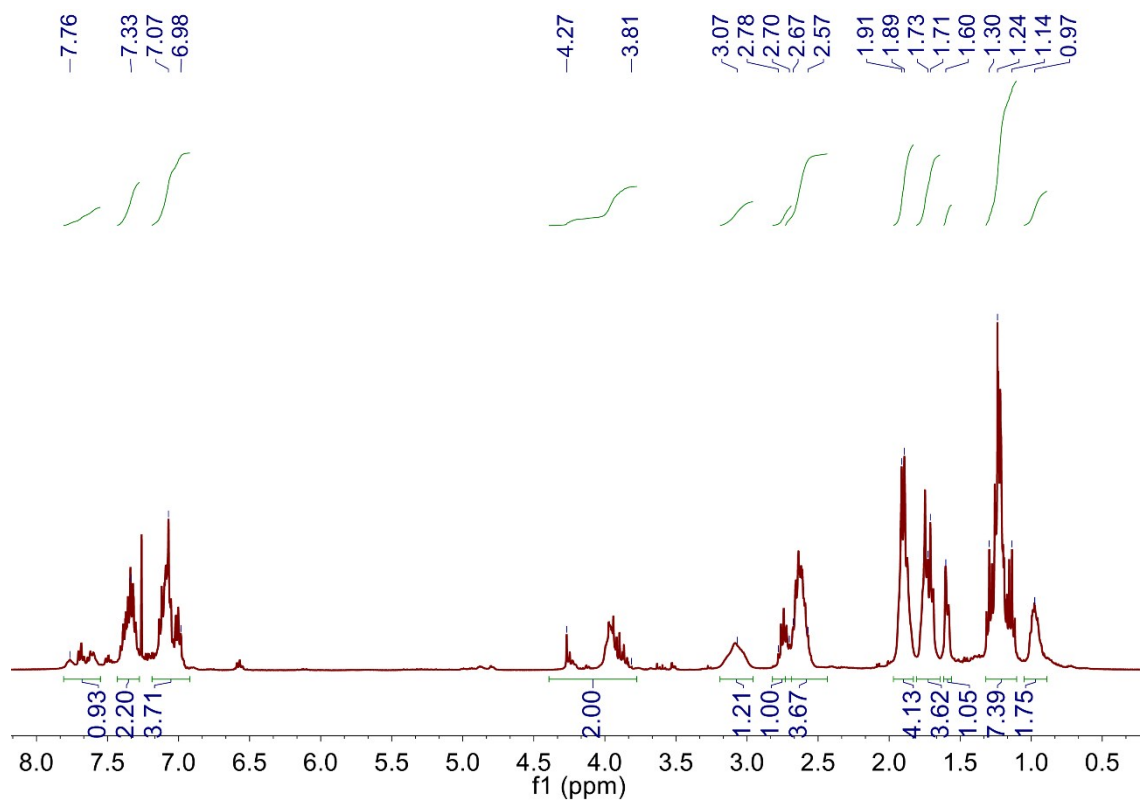

**Figure S23**  $^1\text{H}$  NMR spectrum of  $\text{H}_2\text{L6}$  (400 MHz,  $\text{CDCl}_3$ , 25 °C).

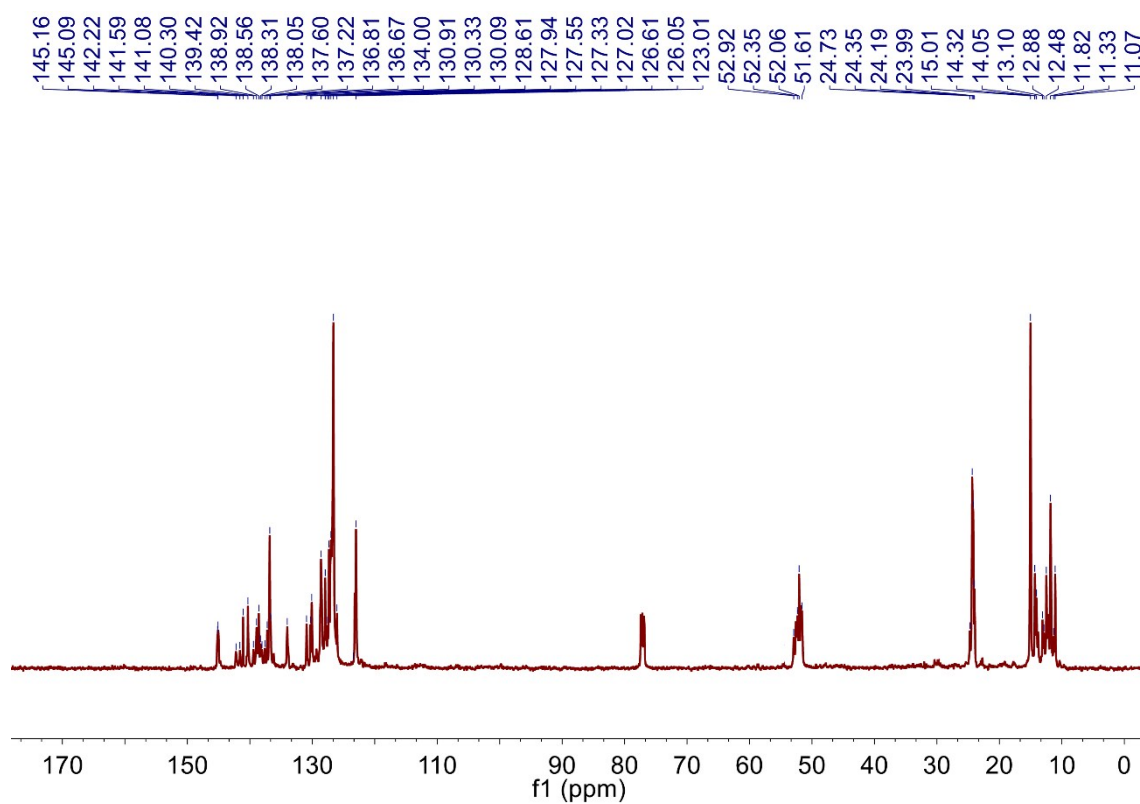

**Figure S24**  $^{13}\text{C}$   $\{^1\text{H}\}$  NMR spectrum of  $\text{H}_2\text{L6}$  (100 MHz,  $\text{CDCl}_3$ , 25 °C).

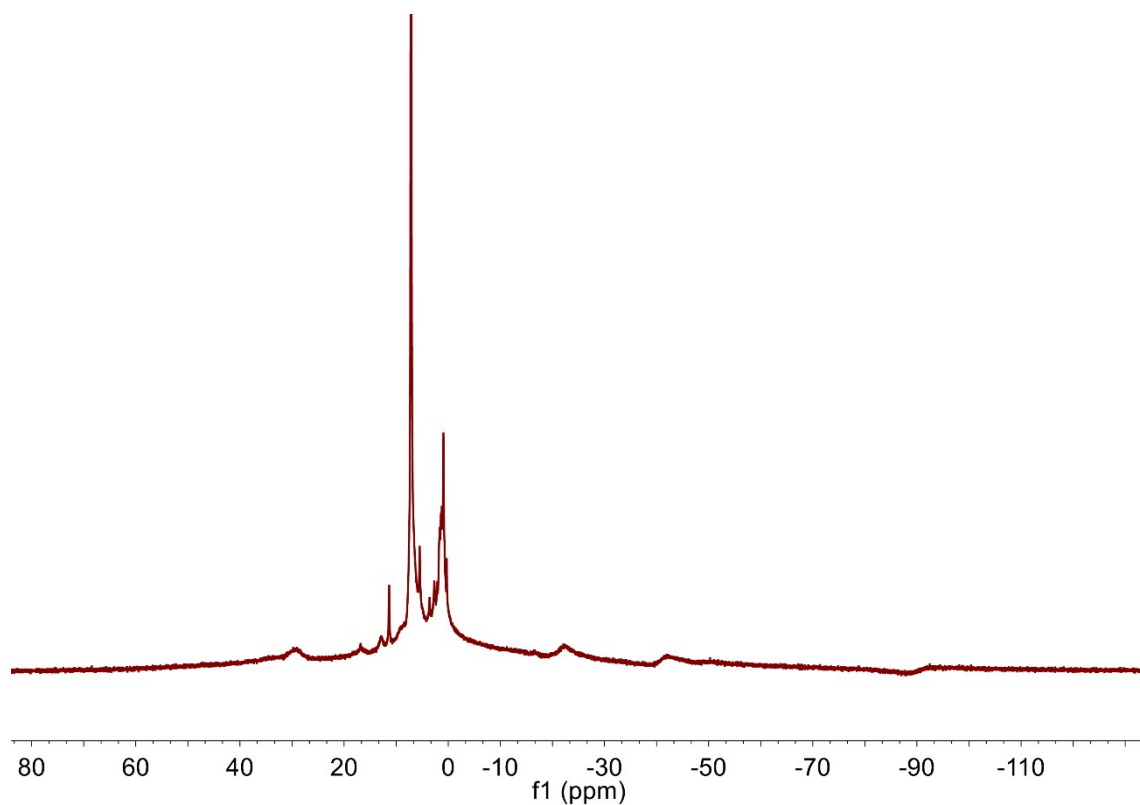

**Figure S25**  $^1\text{H}$  NMR spectrum of complex **1** (400 MHz,  $\text{C}_6\text{D}_6$ , 25  $^\circ\text{C}$ ).

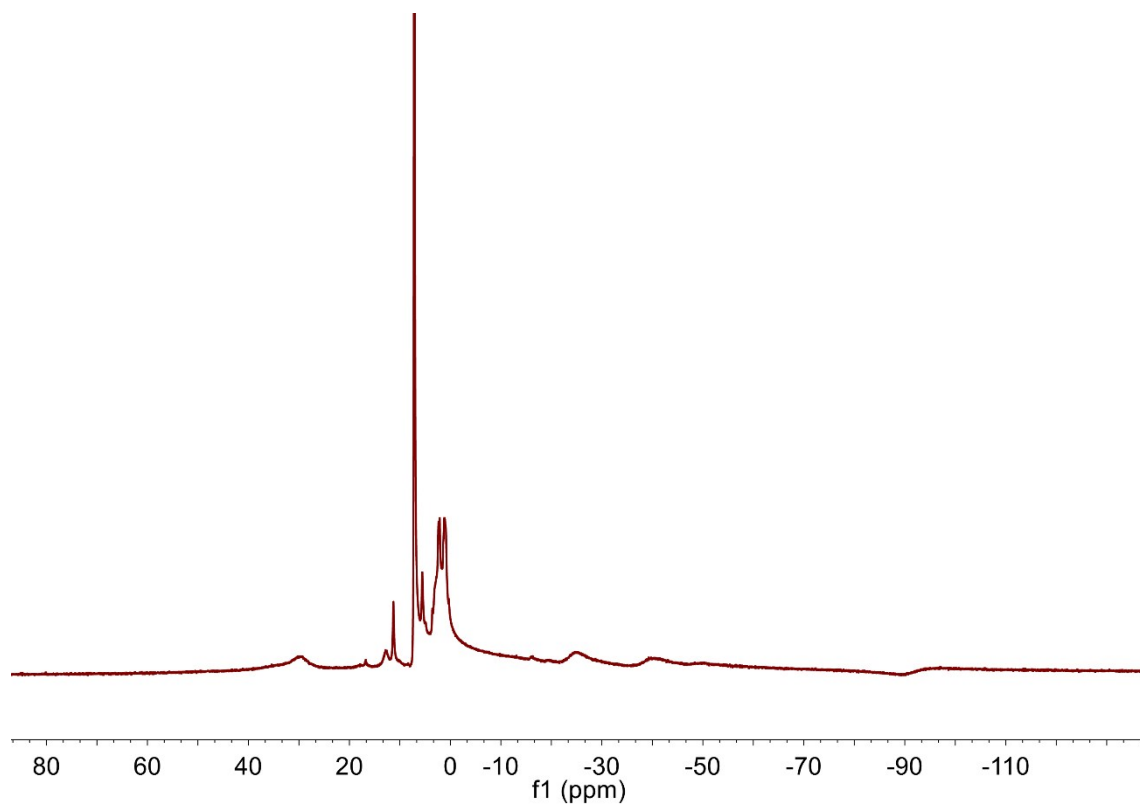

**Figure S26**  $^1\text{H}$  NMR spectrum of complex **2** (400 MHz,  $\text{C}_6\text{D}_6$ , 25  $^\circ\text{C}$ ).

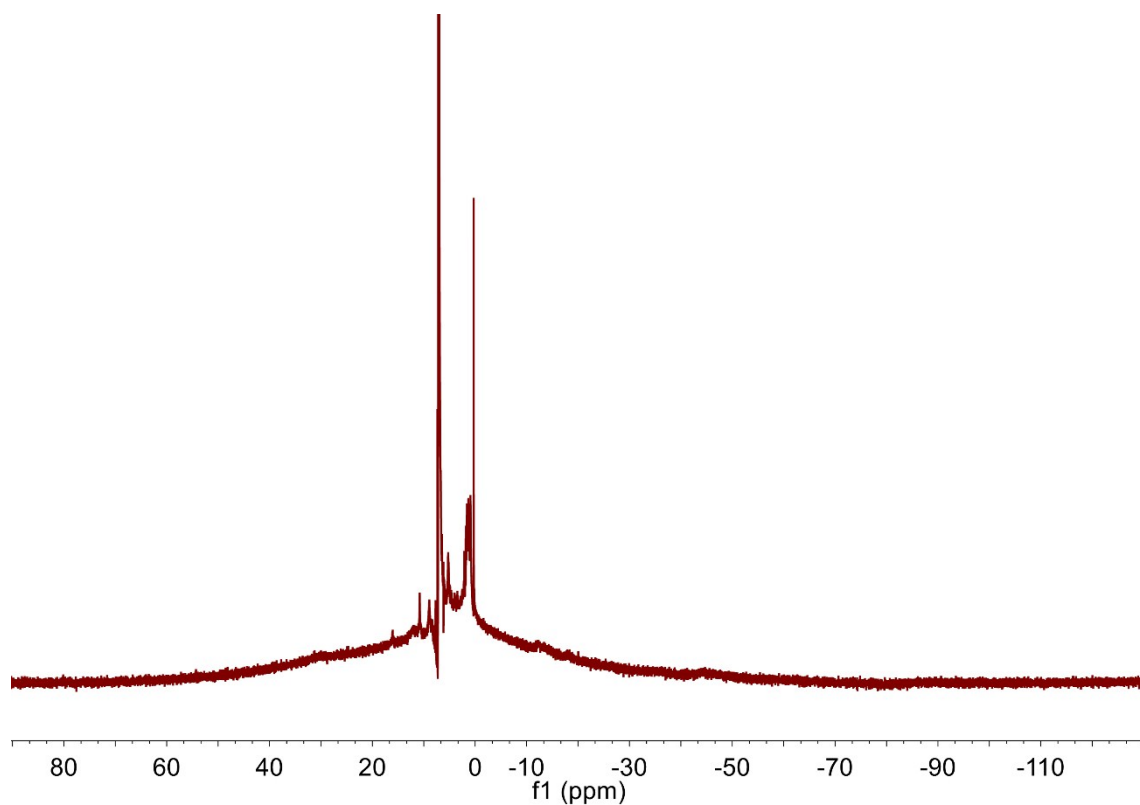

**Figure S27** <sup>1</sup>H NMR spectrum of complex **3** (400 MHz, C<sub>6</sub>D<sub>6</sub>, 25 °C).

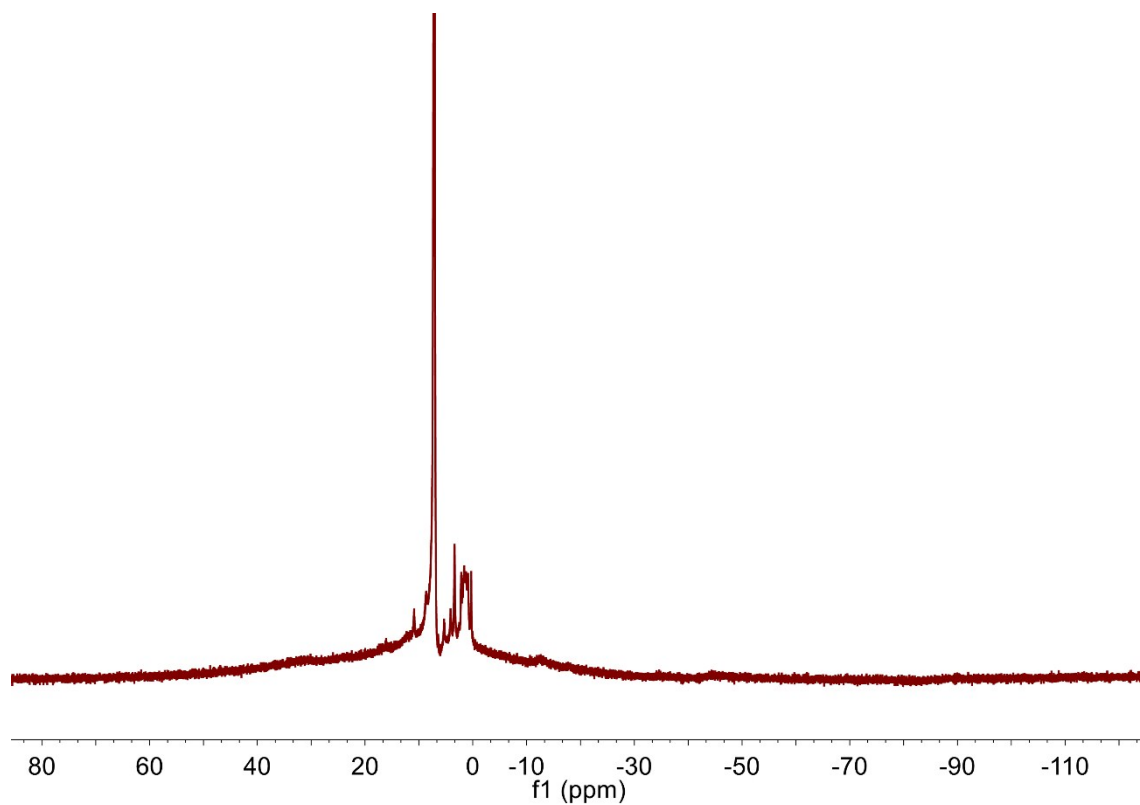

**Figure S28** <sup>1</sup>H NMR spectrum of complex **4** (400 MHz, C<sub>6</sub>D<sub>6</sub>, 25 °C).



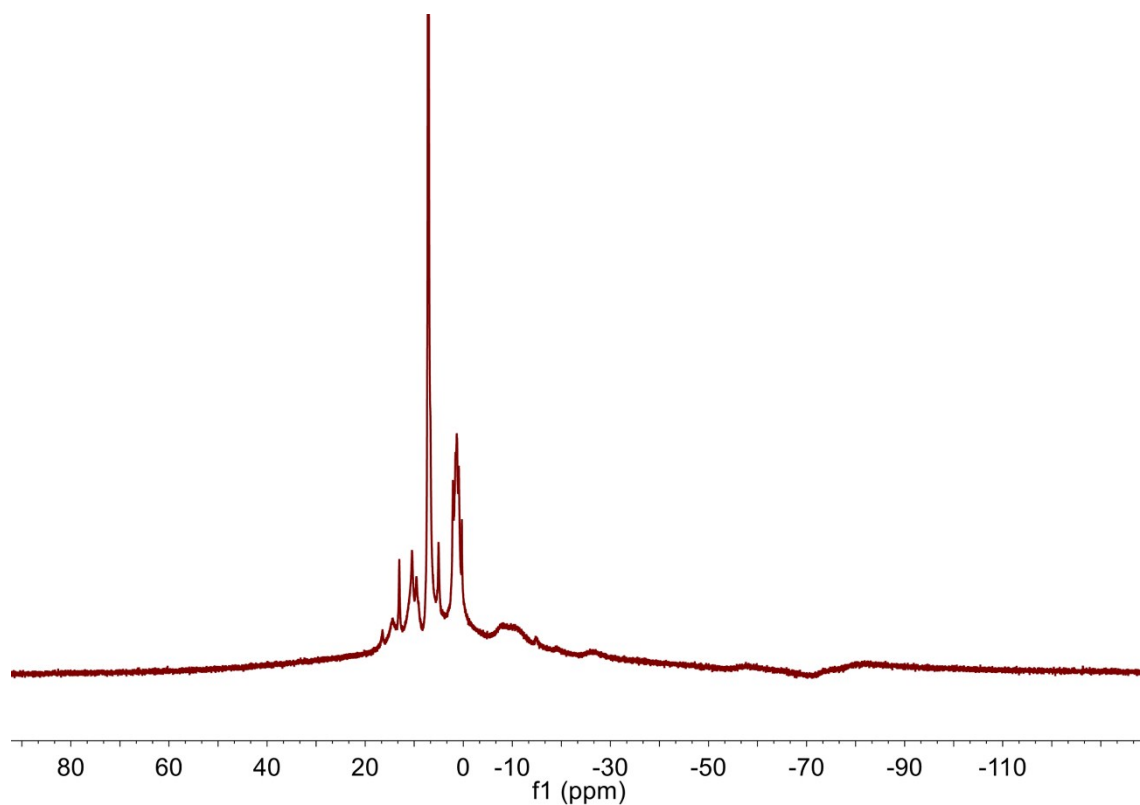

**Figure S29** <sup>1</sup>H NMR spectrum of complex **5** (400 MHz, C<sub>6</sub>D<sub>6</sub>, 25 °C).

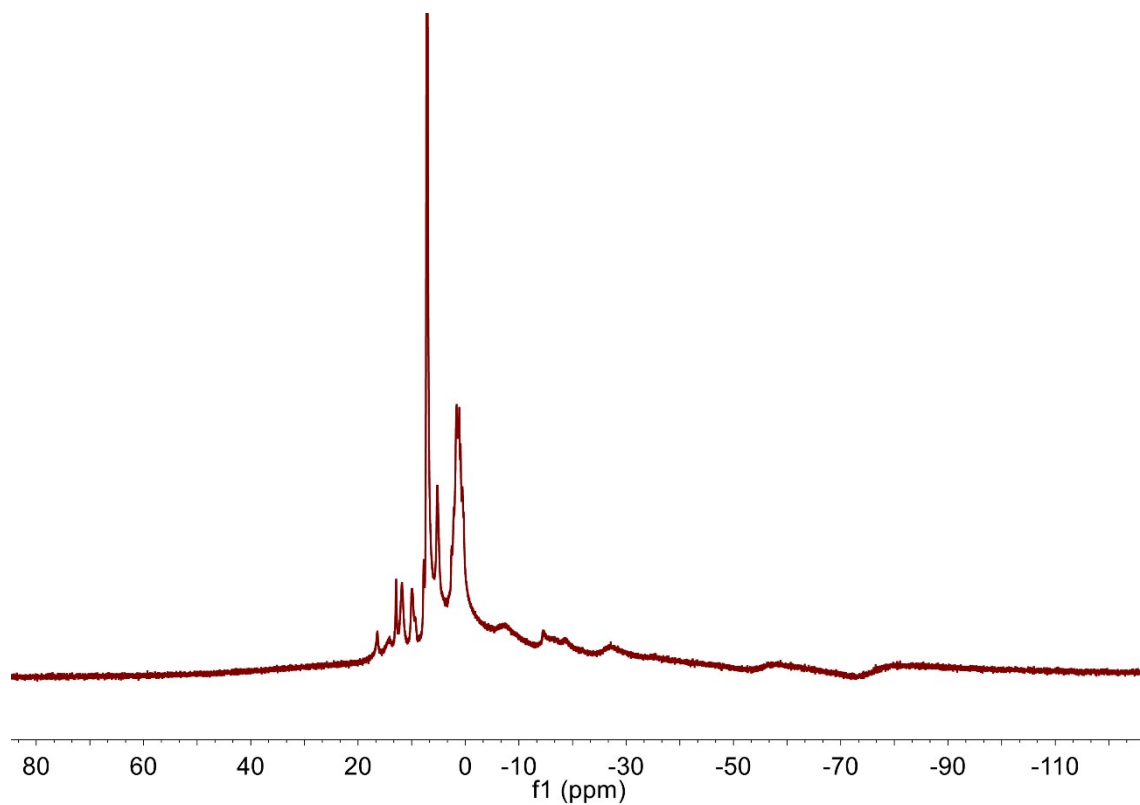

**Figure S30** <sup>1</sup>H NMR spectrum of complex **6** (400 MHz, C<sub>6</sub>D<sub>6</sub>, 25 °C).
